# Supplementary material for: Drought and host selection influence bacterial community dynamics in the grass root microbiome
Source: PubMed Central journal article supplement — ISME J. 2017 Jul 28;11(12):2691–704. doi: 10.1038/ismej.2017.118 (PMC5702725; doi:10.1038/ismej.2017.118), 2017-07-28
Supplement: ismej2017118x2.pdf [file ismej2017118x2.pdf]

**Supplemental Table S1. Field Soil Chemical Analysis of Albany and Kearney sites.** 50g of soil was used for chemical analysis at UMass Soil and Plant Tissue Testing Laboratory. Soil pH, ppm values for micronutrients zinc, manganese, iron, copper are reported.

| <b>Factor</b> | <b>Albany Field</b> | <b>Kearney Field</b> |
|---------------|---------------------|----------------------|
| pH            | 5.2                 | 7.37                 |
| Zn (ppm)      | 3.3                 | 66                   |
| Mn (ppm)      | 29.5                | 295                  |
| Fe (ppm)      | 40                  | 13800                |
| Cu (ppm)      | 1.5                 | 18                   |
| Longitude     | 122.2982° W         | 119.5109° W          |
| Latitude      | 37.8864° N          | 36.6008° N           |
