# Supplementary material for: Drought and host selection influence bacterial community dynamics in the grass root microbiome
Source: PubMed Central journal article supplement — ISME J. 2017 Jul 28;11(12):2691–704. doi: 10.1038/ismej.2017.118 (PMC5702725; doi:10.1038/ismej.2017.118), 2017-07-28
Supplement: ismej2017118x4.pdf [file ismej2017118x4.pdf]

**Supplemental Table ST3. 16S rRNA gene read count**

**Statistics.** Raw reads were processed using a custom pipeline developed at the Joint Genome Institute. The number of total reads in the dataset remaining after each analysis step in this pipeline, as well as the percentage of the initial reads that these values represent, are displayed below.

| <b>Analysis Step</b>  | <b>Read counts</b> | <b>Percentage</b> |
|-----------------------|--------------------|-------------------|
| Input                 | 57,380,917         | 100%              |
| Filtered Contaminants | 57,131,680         | 99.57%            |
| Primer-Trimmed        | 56,898,358         | 99.16%            |
| Extended              | 56,271,063         | 98.07%            |
| Length-Filtered       | 56,155,628         | 97.86%            |
| High Quality          | 45,977,229         | 80.13%            |
| Clustered             | 26,087,863         | 45.46%            |
| Classified            | 25,956,957         | 45.24%            |
| Tax-Filter Pass       | 25,694,125         | 44.78%            |
