# Supplementary material for: Drought and host selection influence bacterial community dynamics in the grass root microbiome
Source: PubMed Central journal article supplement — ISME J. 2017 Jul 28;11(12):2691–704. doi: 10.1038/ismej.2017.118 (PMC5702725; doi:10.1038/ismej.2017.118), 2017-07-28
Supplement: ismej2017118x5.pdf [file ismej2017118x5.pdf]

**Supplemental Table ST4. ANOVA of Shannon's Diversity.** ANOVA analyses for Shannon's Diversity across all samples including the factors Sample Type, Treatment, Species and Timepoint and their interactions. Only interactions with significant effects are reported.

| <b>Factor</b>        | <b>DF</b> | <b>Sum of Squares</b> | <b>Mean Squares</b> | <b>F Statistic</b> | <b>p-value</b> |
|----------------------|-----------|-----------------------|---------------------|--------------------|----------------|
| SampleType           | 2         | 3836639               | 1918319             | 656.302            | <2.00E-16 ***  |
| Treatment            | 1         | 158628                | 158628              | 54.27              | 1.07E-12 ***   |
| Species              | 18        | 210658                | 11703               | 4.004              | 1.233E-07 ***  |
| Time point           | 1         | 47944                 | 47944               | 16.403             | 6.195E-05 ***  |
| SampleType:Treatment | 2         | 35314                 | 17657               | 6.041              | 0.00261 **     |
| SampleType:Species   | 36        | 182506                | 5070                | 1.734              | 0.00667 **     |
| Treatment:Time point | 1         | 29347                 | 29347               | 10.04              | 0.00165 **     |
