# Supplementary material for: Drought and host selection influence bacterial community dynamics in the grass root microbiome
Source: PubMed Central journal article supplement — ISME J. 2017 Jul 28;11(12):2691–704. doi: 10.1038/ismej.2017.118 (PMC5702725; doi:10.1038/ismej.2017.118), 2017-07-28
Supplement: ismej2017118x6.pdf [file ismej2017118x6.pdf]

**Supplemental Table ST5. F-Statistic and confidence intervals for Shannon's Diversity for Bacterial Class.** Upper and lower Bounds for the F-Statistic found for differences in Shannon's Diversity between sample types for the top nine most abundant bacterial classes.

| <b>Class</b>        | <b>LowerBound</b> | <b>UpperBound</b> | <b>F statistic</b> |
|---------------------|-------------------|-------------------|--------------------|
| Bacilli             | 24.22906          | 69.92394          | 44.79578           |
| Solibacteres        | 45.07979          | 104.622           | 76.01229           |
| Acidobacteria       | 53.17106          | 101.2771          | 76.60552           |
| Sphingobacteria     | 64.22925          | 129.2719          | 93.83503           |
| Gammaproteobacteria | 82.08635          | 157.0187          | 117.9769           |
| Alphaproteobacteria | 194.5562          | 304.0301          | 247.6426           |
| Betaproteobacteria  | 203.7225          | 327.171           | 265.1303           |
| Deltaproteobacteria | 328.2457          | 493.3435          | 412.0767           |
| Actinobacteria      | 697.0528          | 1077.342          | 862.1564           |
