# Supplementary material for: Drought and host selection influence bacterial community dynamics in the grass root microbiome
Source: PubMed Central journal article supplement — ISME J. 2017 Jul 28;11(12):2691–704. doi: 10.1038/ismej.2017.118 (PMC5702725; doi:10.1038/ismej.2017.118), 2017-07-28
Supplement: ismej2017118x7.pdf [file ismej2017118x7.pdf]

**Supplemental Table ST6. (a) Canonical Analysis of Principal Coordinates.** Canonical Analysis of Principal Coordinates (CAPs) was performed with the `capscale` function in the R package `vegan` (Oksanen et al., 2016), using either the Bray-Curtis or weighted UniFrac distances generated for each sample type. The degrees of freedom (DF), Variance, F-Statistic, p-value, and relative percent of variance for each factor in our experiment except Sample Type are reported. **(b) Canonical Analysis of Principal Coordinates by Sample Type.** Canonical Analysis of Principal Coordinates (CAPs) was performed with the `capscale` function in the R package `vegan` (Oksanen et al., 2016), using either the Bray-Curtis or weighted UniFrac distances generated for each sample type. The degrees of freedom (DF), Variance, F-Statistic, p-value, and relative percent of variance for each factor in our experiment except Sample Type are reported.

| (a) | Factor     | distance | DF  | Variance | F        | pvalue    |
|-----|------------|----------|-----|----------|----------|-----------|
|     | SampleType | Bray     | 2   | 30.634   | 114.0781 | 0.001 *** |
|     | Treatment  | Bray     | 1   | 4.993    | 37.1863  | 0.001 *** |
|     | Species    | Bray     | 18  | 8.556    | 3.5401   | 0.001 *** |
|     | Time point | Bray     | 1   | 2.863    | 21.3257  | 0.001 *** |
|     | Rep        | Bray     | 2   | 2.14     | 7.9688   | 0.001 *** |
|     | Residual   | Bray     | 587 | 78.816   |          |           |
|     | SampleType | UniFrac  | 2   | 2.25406  | 400.1097 | 0.001 *** |
|     | Treatment  | UniFrac  | 1   | 0.18244  | 64.7686  | 0.001 *** |
|     | Species    | UniFrac  | 18  | 0.12257  | 2.4175   | 0.001 *** |
|     | Time point | UniFrac  | 1   | 0.04387  | 15.5737  | 0.001 *** |
|     | Rep        | UniFrac  | 2   | 0.02568  | 4.5583   | 0.005 **  |
|     | Residual   | UniFrac  | 587 | 1.65346  |          |           |

| (b) | SampleType  | Factor     | distance | DF | Variance | F       | pvalue | Percent of Variance |
|-----|-------------|------------|----------|----|----------|---------|--------|---------------------|
|     | Soil        | Treatment  | Bray     | 1  | 1.4486   | 13.6603 | 0.001  | 5.65                |
|     | Soil        | Species    | Bray     | 18 | 1.9618   | 1.0278  | 0.358  | 7.65                |
|     | Soil        | Time point | Bray     | 1  | 1.2285   | 11.5845 | 0.001  | 4.79                |
|     | Soil        | Rep        | Bray     | 2  | 2.1173   | 9.9827  | 0.001  | 8.26                |
|     | Soil        | Treatment  | UniFrac  | 1  | 0.09549  | 10.2956 | 0.001  | 4.5                 |
|     | Soil        | Species    | UniFrac  | 18 | 0.1563   | 0.9363  | 0.569  | 7.36                |
|     | Soil        | Time point | UniFrac  | 1  | 0.07602  | 8.1969  | 0.001  | 3.58                |
|     | Soil        | Rep        | UniFrac  | 2  | 0.14419  | 7.7734  | 0.001  | 6.79                |
|     | Rhizosphere | Treatment  | Bray     | 1  | 2.4164   | 29.0497 | 0.001  | 9.88                |
|     | Rhizosphere | Species    | Bray     | 18 | 4.7423   | 3.1673  | 0.001  | 19.39               |
|     | Rhizosphere | Time point | Bray     | 1  | 0.9133   | 10.9793 | 0.001  | 3.73                |
|     | Rhizosphere | Rep        | Bray     | 2  | 0.7476   | 4.4939  | 0.001  | 3.06                |
|     | Rhizosphere | Treatment  | UniFrac  | 1  | 47.356   | 54.6033 | 0.001  | 17.77               |
|     | Rhizosphere | Species    | UniFrac  | 18 | 46.145   | 2.956   | 0.001  | 17.32               |
|     | Rhizosphere | Time point | UniFrac  | 1  | 6.946    | 8.0093  | 0.001  | 2.61                |
|     | Rhizosphere | Rep        | UniFrac  | 2  | 2.981    | 1.7189  | 0.1    | 1.12                |
|     | Root        | Treatment  | Bray     | 1  | 3.6406   | 25.7329 | 0.001  | 8.81                |
|     | Root        | Species    | Bray     | 18 | 9.6912   | 3.8056  | 0.001  | 23.44               |
|     | Root        | Time point | Bray     | 1  | 2.1596   | 15.2644 | 0.001  | 5.22                |
|     | Root        | Rep        | Bray     | 2  | 0.8129   | 2.873   | 0.001  | 1.97                |
|     | Root        | Treatment  | UniFrac  | 1  | 0.42379  | 44.6131 | 0.001  | 15.39               |
|     | Root        | Species    | UniFrac  | 18 | 0.50907  | 2.9773  | 0.001  | 18.48               |
|     | Root        | Time point | UniFrac  | 1  | 0.06564  | 6.9105  | 0.001  | 2.38                |
|     | Root        | Rep        | UniFrac  | 2  | 0.07429  | 3.9105  | 0.004  | 2.7                 |
