# Supplementary material for: Drought and host selection influence bacterial community dynamics in the grass root microbiome
Source: PubMed Central journal article supplement — ISME J. 2017 Jul 28;11(12):2691–704. doi: 10.1038/ismej.2017.118 (PMC5702725; doi:10.1038/ismej.2017.118), 2017-07-28
Supplement: ismej2017118x8.pdf [file ismej2017118x8.pdf]

**Supplemental Table ST7. PERMANOVA of Bray-Curtis Distance for DNA Preparation Method.** PERMANOVA analyses for Bray-Curtis Distance across all root samples used to test root preparation method (22 distinct root samples x 2 preparation methods = 44 samples). Experimental factors include Treatment, Species, Replicate, and Preparation (MoBio vs. CTAB).

| <b>Factor</b> | <b>DF</b> | <b>Sum of Squares</b> | <b>Mean Squares</b> | <b>F Statistic</b> | <b>R2</b> | <b>p-value</b> |
|---------------|-----------|-----------------------|---------------------|--------------------|-----------|----------------|
| Treatment     | 1         | 1.3680                | 1.36804             | 18.0429            | 0.20931   | 0.0001 ***     |
| Species       | 6         | 2.2306                | 0.037177            | 4.9032             | 0.34128   | 0.0001 ***     |
| Rep           | 1         | 0.1999                | 0.19989             | 2.6363             | 0.03058   | 0.0121         |
| Prep          | 1         | 0.1595                | 0.15948             | 2.1033             | 0.02440   | 0.0336         |
| Residuals     | 34        | 2.5779                | 0.07582             |                    | 0.39442   |                |
| Total         | 43        | 6.5359                |                     |                    | 1.00000   |                |
