# Supplementary material for: Drought and host selection influence bacterial community dynamics in the grass root microbiome
Source: PubMed Central journal article supplement — ISME J. 2017 Jul 28;11(12):2691–704. doi: 10.1038/ismej.2017.118 (PMC5702725; doi:10.1038/ismej.2017.118), 2017-07-28
Supplement: ismej2017118x9.pdf [file ismej2017118x9.pdf]

**Supplemental Table ST8. Primer Table.** The primers used to amplify the chloroplast genes *ndhF*, *rbcl*, and *matK/trnK* are listed, along with their sequence, location in the sorghum reference genome, amplicon length, and the reference for the source where we obtained the primer sequence.

| Primer ID | Gene                                                  | Primer Name | Sequence (5' to 3')            | Location in <i>S. bicolor</i> reference | Amplicon Length |
|-----------|-------------------------------------------------------|-------------|--------------------------------|-----------------------------------------|-----------------|
| DN001     | <i>ndhF</i> (NADH dehydrogenase)                      | 1F          | ATGGAACATACATATCAATA           | 108161-108180                           | 746             |
| DN002     | <i>ndhF</i> (NADH dehydrogenase)                      | 746R        | CTTCCATAGCATCNGGYAACC          | 107415-107435                           |                 |
| DN003     | <i>ndhF</i> (NADH dehydrogenase)                      | 630F        | AATAGCTAATAACTGGATTCC          | 107531-107551                           |                 |
| DN004     | <i>ndhF</i> (NADH dehydrogenase)                      | 1630R       | AAAGNARTAATATAAGAAGAGG         | 106530-106551                           |                 |
| DN005     | <i>ndhF</i> (NADH dehydrogenase)                      | 1417F       | TTGYATTCAATATCYTTATGGG         | 106743-106764                           |                 |
| DN006     | <i>ndhF</i> (NADH dehydrogenase)                      | 2110R       | CCCCTACATATTTGATACCTTCTC       | 106034-106050                           |                 |
| DN007     | <i>rbcl</i> (rubisco large subunit)                   | 1F          | ATGTCACCACAAACAGAACTAAAGC      | 57693-57718                             | 825             |
| DN008     | <i>rbcl</i> (rubisco large subunit)                   | 826R        | TAATRAGNCAAAGTAGTATTTGC        | 58518-58540                             |                 |
| DN009     | <i>rbcl</i> (rubisco large subunit)                   | 629F        | CATTTATGCGCTGGAGAGACC          | 58321-58341                             |                 |
| DN010     | <i>rbcl</i> (rubisco large subunit)                   | 1388R       | TTCCATAYTTCACAAGCTGC           | 59061-59080                             | 740             |
| DN011     | <i>matK/trnK</i> (maturase K with <i>trnK</i> intron) | trnKmatKF   | ATCTGGGTTGCTAACTCAATG          | 4447-4467                               |                 |
| DN012     | <i>matK/trnK</i> (maturase K with <i>trnK</i> intron) | 161R        | AACGTTTCACAAGTAKTGAAC          | 3561-3581                               |                 |
| DN013     | <i>matK/trnK</i> (maturase K with <i>trnK</i> intron) | 27F         | AAAACRGAATCTCGTCAAC            | 3696-3715                               |                 |
| DN014     | <i>matK/trnK</i> (maturase K with <i>trnK</i> intron) | 897R        | ACAAGRTAAGATTTCCATTTTC         | 2825-2845                               |                 |
| DN015     | <i>matK/trnK</i> (maturase K with <i>trnK</i> intron) | 835F        | CATTATGTTTCGATATCAAGG          | 2888-2907                               |                 |
| DN016     | <i>matK/trnK</i> (maturase K with <i>trnK</i> intron) | trnKmatKR   | CTACTGCAGAACTAGTCGGATGGAGTAGAT | 1935-1956                               | 952             |
