# Supplementary material for: Drought and host selection influence bacterial community dynamics in the grass root microbiome
Source: PubMed Central journal article supplement — ISME J. 2017 Jul 28;11(12):2691–704. doi: 10.1038/ismej.2017.118 (PMC5702725; doi:10.1038/ismej.2017.118), 2017-07-28
Supplement: ismej2017118x10.pdf [file ismej2017118x10.pdf]

**Supplemental Table ST9. PERMANOVA of Bray-Curtis Distance for all samples from primary field site.**

PERMANOVA analyses for Bray-Curtis Distance were performed using the `adonis` function within the package `vegan` (Oksanen et al., 2016). Experimental factors SampleType, Species, Treatment, Time point, Replicate, and Sequencing Run are reported.

| <b>Factor</b>  | <b>DF</b> | <b>Sum of Squares</b> | <b>Mean Squares</b> | <b>F Statistic</b> | <b>R2</b> | <b>Pr(&gt;F)</b> |
|----------------|-----------|-----------------------|---------------------|--------------------|-----------|------------------|
| SampleType     | 2         | 30.62                 | 15.3101             | 131.475            | 0.25631   | 0.001 ***        |
| Species        | 18        | 8.515                 | 0.4731              | 4.063              | 0.07128   | 0.001 ***        |
| Treatment      | 1         | 4.88                  | 4.8801              | 41.908             | 0.04085   | 0.001 ***        |
| Time point     | 1         | 2.861                 | 2.8609              | 24.568             | 0.02395   | 0.001 ***        |
| Rep            | 4         | 3.188                 | 0.797               | 6.844              | 0.02669   | 0.001 ***        |
| Sequencing Run | 5         | 1.859                 | 0.3718              | 3.192              | 0.01556   | 0.001 ***        |
| Residuals      | 580       | 67.54                 | 0.1164              | 0.56536            |           |                  |
| Total          | 611       | 119.464               | 1                   |                    |           |                  |
